# Supplementary material for: Pt nanoparticles decorated rose-like Bi2O2CO3 configurations for efficient photocatalytic removal of water organic pollutants
Source: Royal Society of Chemistry journal article supplement (doi:10.1039/c7ra12236e), 2018-01-01
Supplement: c7ra12236e1.pdf [file c7ra12236e1.pdf]

## Pt nanoparticles decorated rose-like $\text{Bi}_2\text{O}_2\text{CO}_3$ configurations for efficient photocatalytic removal of water organic pollutants

Huijuan Chen<sup>a</sup>, Zhongfu Zhou<sup>b,c,d,\*</sup>, G. Neville Greaves<sup>d,e,f</sup>, Salma Nigar<sup>a</sup>, Huaqiang  
Cao<sup>g</sup>, Tingkai Zhao<sup>h</sup> & Xionggang Lu<sup>b</sup>

- School of Material Science and Engineering, Shanghai University, Shanghai 200444, PR China
- State Key Laboratory of Advanced Special Steel, Shanghai University, Shanghai 200072, PR China.
- Key Laboratory of Material Microstructures, Shanghai University, Shanghai 200444, PR China.
- Department of Physics, Aberystwyth University, Aberystwyth SY23 3BZ, UK.
- State Key Laboratory of Silicate Materials for Architectures, Wuhan University of Technology, Wuhan 430070, China.
- Department of Materials Science and Metallurgy, University of Cambridge, Charles Babbage Road, Cambridge, CB2 3QZ, United Kingdom.
- Department of Chemistry, Tsinghua University, Beijing 100084, PR China.
- State Key Laboratory of Solidification Processing, School of Materials Science and Engineering, Northwestern Polytechnical University, Xi'an 710072, PR China.

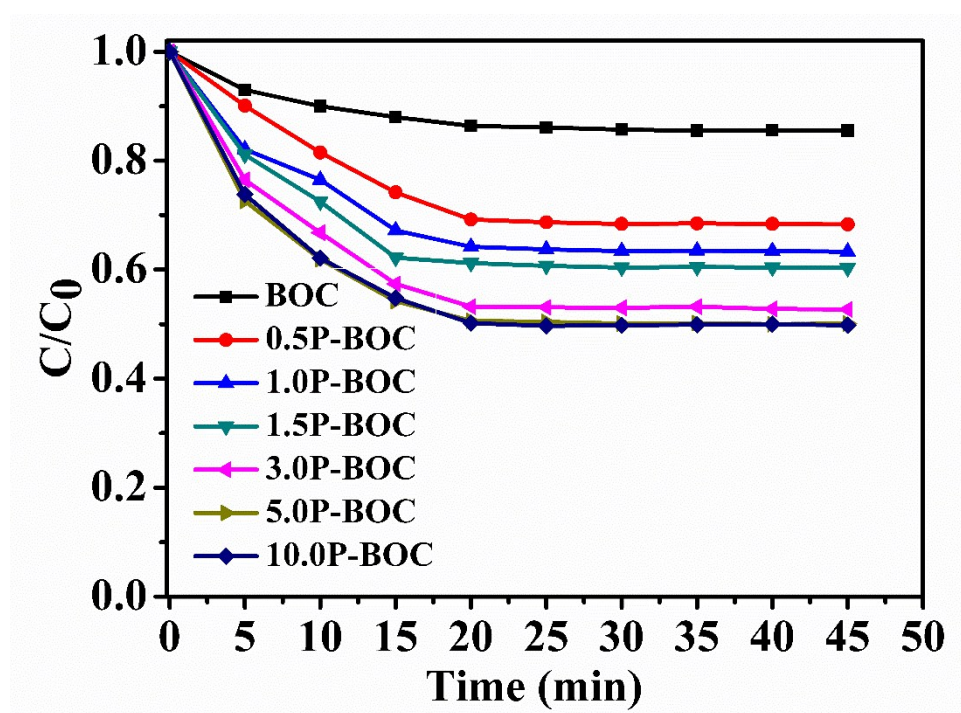

**Figure S1.** The adsorption-desorption equilibrium curves before light irradiation.

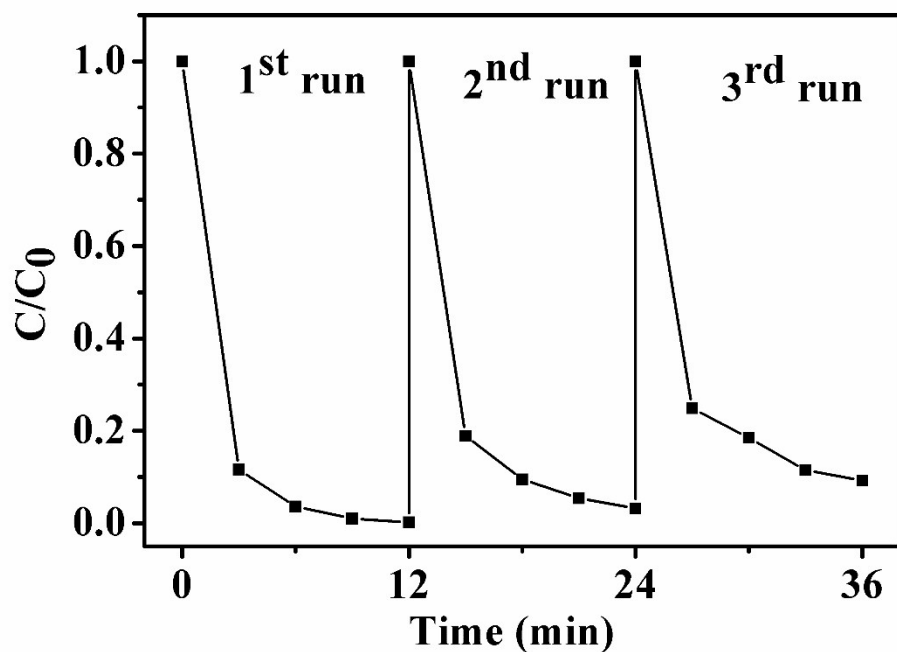

**Figure S2.** The cycling experiment of the 3.0 P-BOC for degradation of RhB.

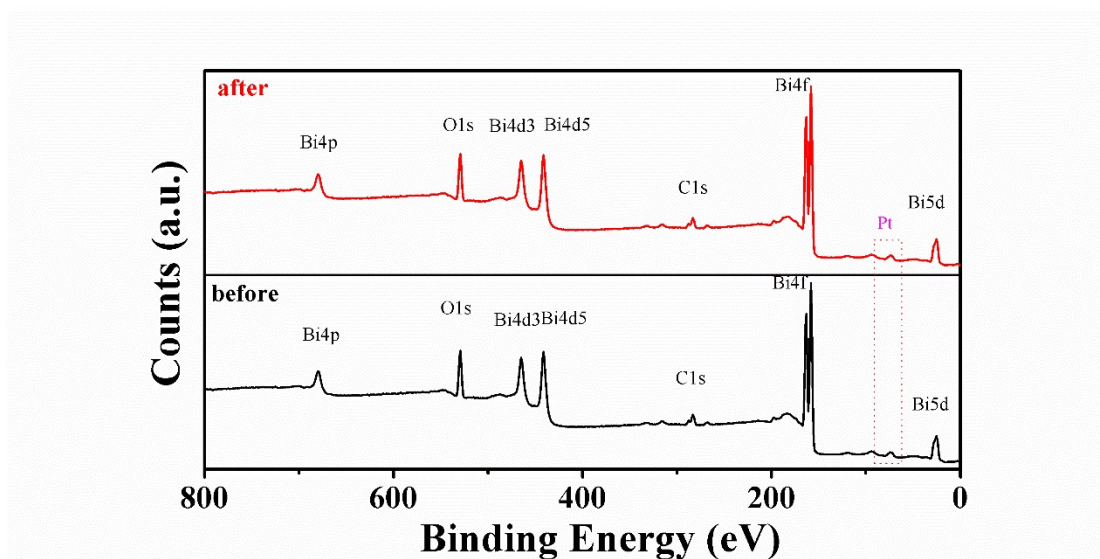

**Figure S3.** XPS spectra of the 3.0 P-BOC before and after degradation of RhB.
